# Supplementary material for: Ultra-thin spin coated crosslinkable hydrogels for use in cell sheet recovery—synthesis, characterisation to application
Source: Royal Society of Chemistry journal article supplement (doi:10.1039/c2sm06466a), 2012-01-01
Supplement: c2sm06466a.pdf [file c2sm06466a.pdf]

# Ultra-thin Spin Coated Crosslinkable Hydrogels for use in Cell Sheet Recovery - Synthesis, Characterization to Application

**Maria E. Nash,<sup>a,b\*</sup> William M. Carroll,<sup>a</sup> Padraic J. Foley,<sup>d</sup> Garrett Maguire,<sup>b</sup> Claire O'Connell,<sup>c</sup> Alexander Gorelov,<sup>d</sup> Sergey Beloshapkin<sup>e</sup> and Yury Rochev<sup>b</sup>**

<sup>a</sup> *School of Chemistry, National University of Ireland, Galway, Ireland.*

<sup>b</sup> *National Centre for Biomedical Engineering Science, National University of Ireland, Galway, Ireland.*

<sup>c</sup> *National Centre for Laser Applications, National University of Ireland, Galway, Ireland.*

<sup>d</sup> *School of Chemistry and Chemical Biology, University College Dublin, Ireland.*

<sup>e</sup> *Materials and Surface Science Institute, University of Limerick, Ireland.*

\* Corresponding Author Contact Details: *nash.maria@gmail.com*

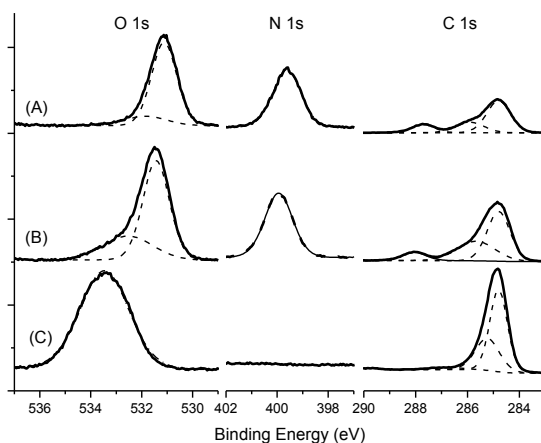

**Fig.S1** XPS spectra of A)  $\approx$  188 nm thick film. B)  $\approx$  13 nm thick spin coated film. C) TCP substrate. C 1s spectra were scaled down by factor of 5 to fit with other intensities. The solid line represents the actual spectra obtained and the dotted lines represent the deconvolution of the broader peaks into individual components.

Figure 4 shows the XPS spectra of oxygen, nitrogen, carbon regions obtained from; A) NIPAm-*co*-AcBzPh films of approximately 188nm in thickness, B NIPAm-*co*-AcBzPh film of an approximate thickness of 13nm and C) a TCP bare substrate. XPS spectra of the thicker spin coated samples of NIPAm-*co*-AcBzPh correspond to XPS pNIPAm spectra obtained by other authors.<sup>9</sup> The contribution of AcBzPh in XPS spectra is negligible *i.e.* undetectable, because of the relative low concentration of the AcBzPh fraction, similar to FTIR analysis.

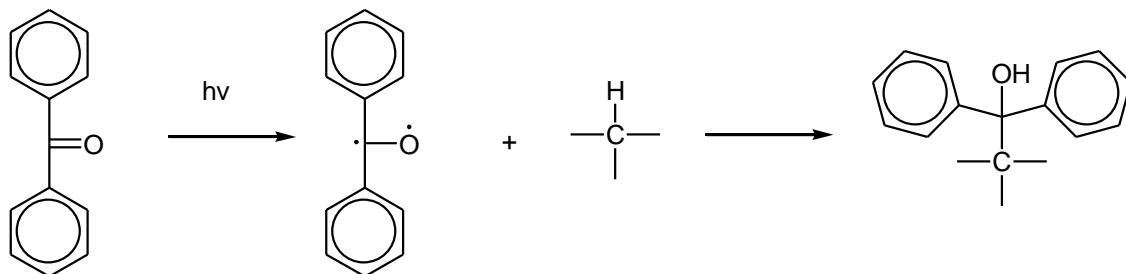

**Fig. S.2** The proposed crosslinking mechanism involves a CH insertion as above.
